# Supplementary material
Source: publisher figshare collection journal article supplement (https://tandf.figshare.com/ndownloader/files/18665141)
Supplement: Supplementary file 1 [file 18665141]

**Appendices: Supplementary materials**

**Appendix A: Proof of the derivation process of the equilibrium solutions in the four models**

For a more concise presentation of equilibrium solutions, we introduce the following notation, ,, ,, , , , , , and , where , representing the manufacturer and retailer, respectively.

**Appendix A-1: Equilibrium solution derivation for model *MM***

In model *MM*, the Lagrangian function for the retailer’s optimization problem is stated as follows: , where is the Lagrangian multiplier and . According to backward induction, given , , , and , , , and , one can confirm that the Lagrangian function is strictly and jointly concave in decision variables and and, hence, has a unique optimal solution. Solving the first-order condition and , we can obtain the optimal response functions for the retailer and .

These response functions are then substituted into the manufacturer’s profit function . If , the manufacturer’s profit function is strictly and jointly concave in decision variables , and *t*. In this case, model *MM* has a unique optimal solution. Solving the first-order condition , , and , we obtain the manufacturer’s optimal solutions , , and . Thus, the optimal retail prices of new and remanufactured products are derived as and , respectively.

Substituting , ,, and into , since , one can confirm that the Lagrangian function is strictly concave in decision variable and, hence, has a unique optimal solution. Solving the first-order condition , we can obtain the optimal response function for the retailer . Then, by substituting , ,,, and into the manufacturer’s profit function , as , one can confirm that the manufacturer’s profit function is strictly concave in decision variable and, hence, has a unique optimal solution. Solving the first-order condition , we can obtain . Thus, the optimal pricing decisions of new and remanufactured products and the warranty period for remanufactured products are derived as , , , , and , respectively.

According to the Karush-Kuhn-Tucker condition, there are two possible cases for the optimal solutions corresponding to different Lagrangian coefficient as follows.

Case I: When , (denoted as partial remanufacturing) can be derived based on the Complementary Relaxation Theorem. The manufacturer’s optimal solutions are , , , and , the retailer’s optimal solutions are , and . Hence, the optimal quantities, individual and channel profits are derived as , , , , , and , respectively. Then, according to , we obtain the condition for Case I as .

Case II: When , (denoted as complete remanufacturing) can be derived based on the Complementary Relaxation Theorem. It is easy to get given . By substituting it into the manufacturer’s and retailer’s optimal solutions, we obtain , , , , , and . Hence, the optimal quantities, individual and channel profits are derived as , , , , , and , respectively. Furthermore, is derived from , corresponding to the condition for Case II.

Thus, the equilibrium solutions are obtained for model *MM*.

**Appendix A-2: Equilibrium solution derivation for model *RR***

In model *RR*, the Lagrangian function for the retailer’s optimization problem is given as: , where is the Lagrangian multiplier and . According to backward induction, given , , and , since , , , , , and , one confirms that, if , the retailer’s Lagrangian function is strictly and jointly concave in decision variables , and , meaning that has a unique optimal solution. Solving the first-order conditions , , and , we can obtain the optimal response functions for the retailer , , and .

These three response functions are then substituted into the manufacturer’s profit function . If , , , , then, one can confirm that the manufacturer’s profit function is strictly and jointly concave in decision variables and . Then, model *RR* has a unique optimal solution. Solving the first-order conditions and , we obtain the manufacturer’s optimal solutions and . Thus, the optimal retail prices of new and remanufactured products and warranty period decision are derived as and , and , respectively.

Substituting , , , and into , since , one can confirm that the Lagrangian function is strictly concave in decision variable and, hence, has a unique optimal solution. Solving the first-order condition , we can obtain the optimal response function for the retailer . Then, by substituting , , , , and into the manufacturer’s profit function , as , one can confirm that the manufacturer’s profit function is strictly concave in decision variable and, thus, has a unique optimal solution. Solving the first-order condition , we can obtain . Thus, the optimal pricing decisions of new and remanufactured products and the warranty period for remanufactured products are derived as , , , , , and , respectively.

According to the Karush-Kuhn-Tucker condition, there exist two possible cases for the optimal solutions corresponding to different Lagrangian coefficient as follows.

Case I: When , the manufacturer’s optimal solutions are , and , the retailer’s optimal solutions are , , , and . Hence, the optimal quantities, individual and channel profits are derived as , , , , , and , respectively. Then, can be obtained from the Complementary Relaxation Theorem. Therefore, we obtain the condition for Case I as .

Case II: When , can be derived based on the Complementary Relaxation Theorem. It is easy to confirm given . By substituting it into the manufacturer’s and retailer’s optimal solutions, we have ,,, ,, , and . Hence, the optimal quantities, individual and channel profits are derived as ,, , , , and , respectively. Furthermore, is derived from , corresponding to the condition for Case II.

Thus, we confirm the equilibrium solutions for model *RR*.

**Appendix A-3: Equilibrium solution derivation for model *MN***

In model *MN*, the Lagrangian function for the retailer’s optimization problem is furnished as follows: , where is the Lagrangian multiplier and . According to backward induction, given , , and , since , , and , one can confirm that is strictly and jointly concave in decision variables and , hence, has a unique optimal solution. Solving the first-order conditions and , we obtain the optimal response functions for the retailer as and .

These two response functions are then substituted into the manufacturer’s profit function . Solving the first-order conditions and , we obtain the manufacturer’s optimal solutions and . Thus, the optimal retail prices of new and remanufactured products are obtained as and , respectively. Then, similar to model *MM*, we can obtain and .

According to the Karush-Kuhn-Tucker condition, two possible cases may arise for the optimal solutions corresponding to different Lagrangian coefficient as follows.

Case I: When , the manufacturer’s optimal solutions are , and , the retailer’s optimal solutions are , and . Hence, the optimal quantities, individual and channel profits are derived as , , , , , and , respectively. Then, can be obtained from the Complementary Relaxation Theorem. Therefore, we obtain the condition for Case I as .

Case II: When , can be derived based on the Complementary Relaxation Theorem. It is easy to get given . By substituting it into the manufacturer’s and retailer’s optimal solutions, we have , , ; the retailer’s optimal solutions are , , . Hence, the optimal quantities, individual and channel profits are derived as , , , , , , respectively. Furthermore, is derived from , corresponding to the condition for Case II.

Thus, we obtain the equilibrium solutions for model *MN*.

**Appendix A-4: Equilibrium solution derivation for model *RN***

In model *RN*, the Lagrangian function for the retailer’s optimization problem is given as follows: , where is the Lagrangian multiplier and . According to backward induction, given , , and , since , , and , one can confirm that the Lagrangian function is strictly and jointly concave in decision variables and and, hence, has a unique optimal solution. Solving the first-order conditions and , we obtain the optimal response functions for the retailer as and .

These two functions are then substituted into the manufacturer’s profit function . Solving the first-order conditions and , we obtain the manufacturer’s optimal solutions and . Thus, the optimal retail prices of new and remanufactured products are derived as and , respectively. Then, similar to model *RR*, we can obtain and .

According to the Karush-Kuhn-Tucker condition, there exist two possible cases for the optimal solutions corresponding to different Lagrangian coefficient as follows.

Case I: When , the manufacturer’s optimal solutions are , and , the retailer’s optimal solutions are , and . Hence, the optimal quantities, individual and channel profits are derived as , , , , , , respectively. Then, is confirmed by the Complementary Relaxation Theorem. Therefore, we derive the condition for Case I as .

Case II: When , can be verified by the Complementary Relaxation Theorem. It is easy to get given . By substituting it into the manufacturer’s and retailer’s optimal solutions, we have , , ; , and . Hence, the optimal quantities, individual and channel profits are obtained as , , , ,, , respectively. Furthermore, is derived from , corresponding to the condition for Case II.

Thus, the equilibrium solutions are confirmed for model *RN*.

**Appendix B: Proof of Proposition 1**

When the manufacturer commits to partial remanufacturing, by subtracting the wholesale and retail prices of remanufactured products under models *MN* and *RN* from those under models *MM* and *RR*, respectively, we get , ; , and . Similarly, for the wholesale and retail prices of new products in the four models, one has ,, , and .

When the manufacturer commits to complete remanufacturing, by subtracting the wholesale and retail prices of remanufactured products under models *MN* and *RN* from those under models *MM* and *RR*, respectively, we obtain , ; , and . Similarly, for new products, we have , ,; , , and .

Proposition 1 is thus proved.

**Appendix C: Proof of Proposition 2**

When the manufacturer commits to partial remanufacturing, by subtracting the manufacturer’s and the retailer’s profits under models *MN* and *RN* from those under models *MM* and *RR*, respectively, we can obtain , , , and . Then, and can be derived. By subtracting consumer surplus under models *MN* and *RN* from that under models *MM* and *RR*, respectively, we have and .

When the manufacturer commits to complete remanufacturing, by subtracting the manufacturer’s and the retailer’s profits under models *MN* and *RN* from those under models *MM* and *RR*, respectively, we can obtain , , , . Then, and can be verified. By subtracting consumer surplus under models *MN* and *RN* from that under models *MM* and *RR*, respectively, we can obtain and .

Proposition 2 is thus proved.

**Appendix D: Proof of Corollary 1**

When the manufacturer commits to partial remanufacturing, by subtracting the manufacturer’s and the retailer’s profits under models *MN* and *RN* from those under models *MM* and *RR*, respectively, we can obtain , , , and . Then, ; .

When the manufacturer commits to complete remanufacturing, by subtracting the manufacturer’s and the retailer’s profits under models *MN* and *RN* from those under models *MM* and *RR*, respectively, we have , , , and . Then, ; .

This completes the proof of Corollary 1.

**Appendix E: Proof of Proposition 3**

It can be seen from that is the condition for model *MM* to have a unique optimal solution. In addition, given the assumption , we can derive another boundary of , denoted by as shown below.

When the manufacturer commits to partial remanufacturing, by subtracting the optimal warranty period under model *RR* from that under model *MM*, we can obtain , where . Solving equation for , we derive . In addition, we can derive from . Since and , the conclusion of Proposition 3 is confirmed under the partial remanufacturing strategy.

When the manufacturer commits to complete remanufacturing, by subtracting the optimal warranty period under model *RR* from that under model *MM*, we have , where . Solving equation for , we derive . In addition, we can derive from . Since and , the conclusion of Proposition 3 is confirmed under the complete remanufacturing strategy as well.

Proposition 3 is thus proved.

**Appendix F: Proof of Corollary 2**

By subtracting the optimal retail price under model *RR* from that under model *MM*, we obtain and , where , . Solving equations and for , we obtain and . Hence, Corollary 2 is verified due to and .

This completes the proof of Corollary 2.

**Appendix G: Proof of Proposition 4**

When the manufacturer commits to partial remanufacturing, by subtracting the manufacturer's profit in model *RR* from that in model *MM*, we obtain where . Because , , and is the lower bound to ensure that under the partial remanufacturing strategy, we have . By subtracting the retailer's profit in model *RR* from that in model *MM*, we derive, where. Given , regardless of , where is the lower bound to ensure that under the partial remanufacturing strategy and, hence, .

When the manufacturer commits to complete remanufacturing, , where . Since , , and is the lower bound to ensure that under the complete remanufacturing strategy, one has . By subtracting the retailer's profit in model *RR* from that in model *MM*, we derive , where . Given, regardless of , where is the lower bound to ensure that under the complete remanufacturing strategy and, hence, .

Proposition 4 is thus proved.

**Appendix H: Proof of Proposition 5**

By subtracting the channel profit in model *RR* from that in model *MM* when the manufacturer commits to partial remanufacturing, we derive , where . Given , solving equation for yields , where . If , ; otherwise, , where is the lower bound to ensure that under the partial remanufacturing strategy. Since and , we have when and , thus . When and (or ), . Given , solving equation for yields , and . In this case, if , and, hence, ; if , and, then, ; if, and, thus . Set , Proposition 5 is proved when the manufacturer commits to partial remanufacturing.

By subtracting the channel profit in model *RR* from that in model *MM* when the manufacturer commits to complete remanufacturing, we derive , where . Given , solving equation for yields, where . If , ; otherwise , , where is the lower bound to ensure that . Since and , we have when and , thus . When and (or), . Given , solving equation for yields , and . In this case, if, and, hence; if ,and, then, ; if , and, thus . Set , Proposition 5 is proved when the manufacturer commits to complete remanufacturing.

This completes the proof of Proposition 5.

**Appendix I: Proof of Proposition 6**

By subtracting the optimal consumer surplus in model *RR* from that in model *MM*, we have when the manufacturer commits to partial remanufacturing, where . Since, given , solving equation for yields . If , . In this case, if , and, hence ; if, and, then, ; if, and, thus . If , then , we can infer that .

When the manufacturer commits to complete remanufacturing, , where . Since, given , solving equation , we can obtain the solution . If , . In this case, if , and, then, ; if , and, then, ; if , and, then . If , and, thus .

This completes the proof of Proposition 6.
